# Supplementary material for: Two-dimensional ternary pentagonal BCX (X = P, As, and Sb): promising photocatalyst semiconductors for water splitting with strong piezoelectricity
Source: Royal Society of Chemistry journal article supplement (doi:10.1039/d3cp04866g), 2023-11-25
Supplement: d3cp04866g1.pdf [file d3cp04866g1.pdf]

Two-Dimensional ternary pentagonal BCX (X=P, As, and Sb):  
promising photocatalyst semiconductors for water splitting with  
strong piezoelectricity

Luqi Liu<sup>a</sup>, Xuxin Kang<sup>a</sup>, Shan Gao<sup>a,b,\*</sup>, Xiangmei Duan<sup>a,b,\*</sup>

<sup>a</sup> School of Physical Science and Technology, Ningbo University, Ningbo, P. R. China

E-mail: [gaoshan@nbu.edu.cn](mailto:gaoshan@nbu.edu.cn); [duanxiangmei@nbu.edu.cn](mailto:duanxiangmei@nbu.edu.cn)

<sup>b</sup> Laboratory of Clean Energy Storage and Conversion, Ningbo University, Ningbo, P.  
R. China

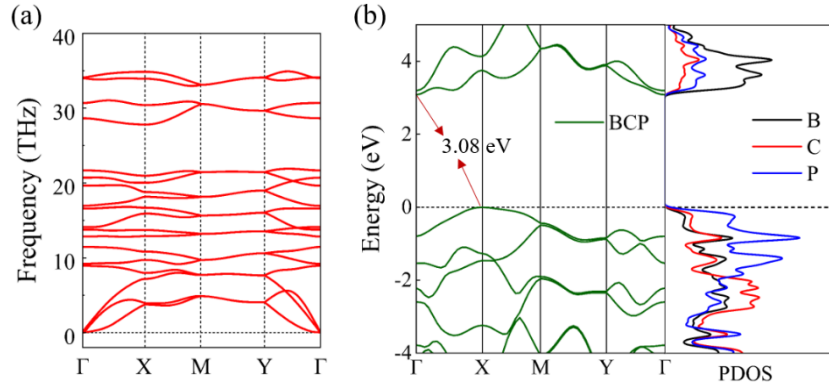

**Fig. S1** (a)The phonon spectra, (b) HSE06 band structures and the corresponding partial density of states of BCP monolayer.

**Table S1.** Elastic constants ( $C_i$ , in  $\text{Nm}^{-2}$ ), Young's modulus ( $E$ , in  $\text{Nm}^{-2}$ ), and Poisson's ratio ( $\nu$ ) of BCX sheets. The reported data for pentagonal BCP are included for comparison.

| BCX                | $C_{11}$ | $C_{12}$ | $C_{22}$ | $C_{66}$ | $E_x$ | $E_y$ | $\nu_x$ | $\nu_y$ |
|--------------------|----------|----------|----------|----------|-------|-------|---------|---------|
| BCP                | 49.50    | 63.47    | 159.68   | 77.15    | 24.28 | 78.31 | 0.40    | 1.28    |
| BCAs               | 50.27    | 50.11    | 144.82   | 62.52    | 32.93 | 35.82 | 0.35    | 1.00    |
| BCSb               | 44.28    | 36.59    | 114.08   | 46.16    | 32.55 | 36.50 | 0.32    | 0.83    |
| BCP <sup>[1]</sup> | 47.49    | 61.81    | 153.08   | 76.04    | 22.65 | 73.35 | 0.40    | 1.30    |

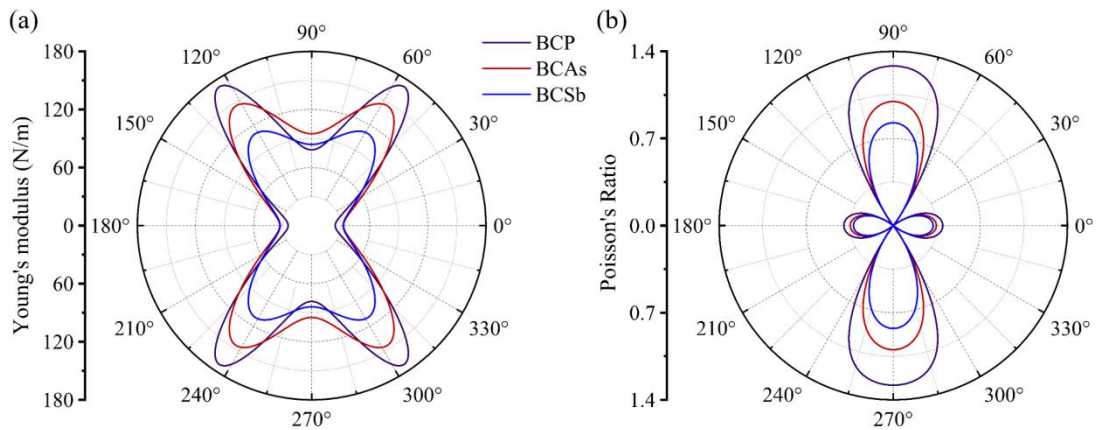

**Fig. S2** Orientation-dependent anisotropic characteristics of (a) Young's modulus and (b) Poisson's ratio of BCX monolayers.

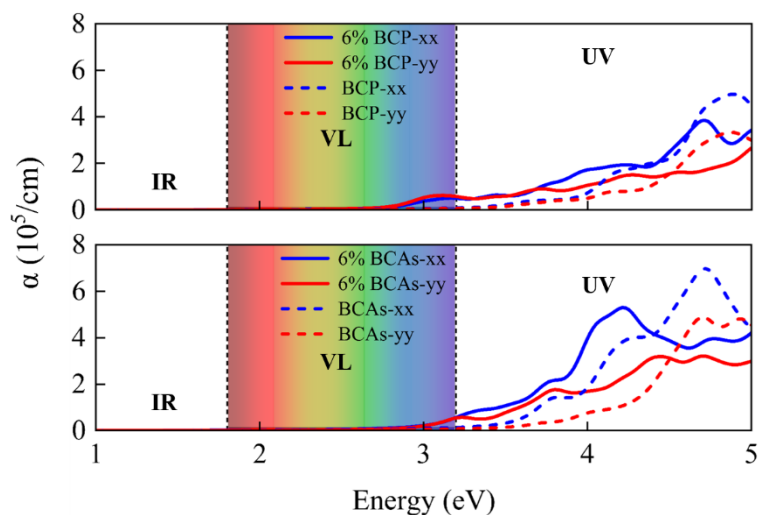

**Fig. S3** In-plane optical absorption coefficients of pristine (in dotted line) and 6% strained (in solid line) BCP and BCAs. The energy ranges for the IR (infrared), VL (visible light), and UV (ultraviolet) regions are marked.

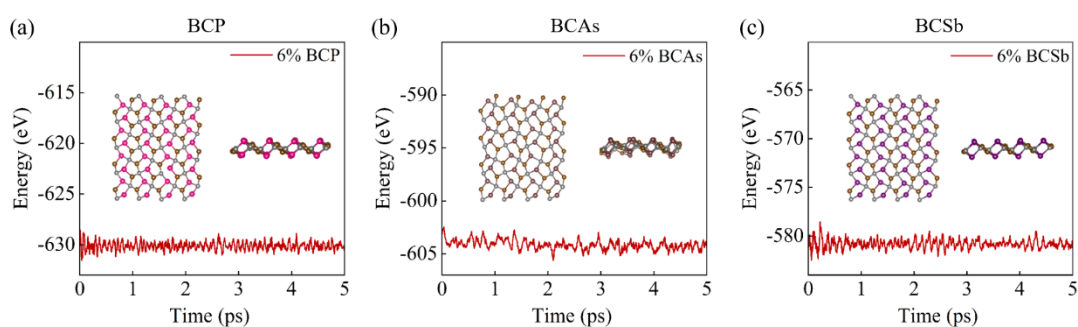

**Fig. S4** Energy fluctuations for strained monolayers (a) BCP, (b) BCAs, and (c) BCSb by MD simulations at 300 K. The insets are the snapshots taken from the end of each simulation.

## References

- 1 C. Hou, Y. Shen, W. Sun, Y. Chen, D. Ni and Q. Wang, *J. Mater. Chem. C*, 2022, 10, 10302–10309.
